# Supplementary material
Source: PubMed Central journal article supplement (PMC1783466)
Supplement: 7601514s1.pdf [file 7601514s1.pdf]

## Supplemental information

### *Cloning and mutagenesis procedures*

*CCP1* or a *CCP1* variant encoding a twelve histidine-tag fused to the C-terminus of Ccp1 (Ccp1-his) was cloned into the *EcoRI* and *XhoI* sites of pGEM4. For constitutive expression in yeast, *CCP1* and derivatives thereof were cloned into the *EcoRI* and *SacI* sites of pYX142 or pYX132. Mutations in Ccp1, in conserved ATPase and proteolytic motifs of Yta10 and Yta12 (Yta10<sup>D634A</sup> and Yta12<sup>D689A</sup>, Yta10<sup>K334A</sup> and Yta12<sup>K394A</sup>, Yta10<sup>E388Q</sup> and Yta12<sup>E448Q</sup>), and in the conserved central pore loop motifs of Yta10 and Yta12 (Yta10<sup>F361S</sup> and Yta12<sup>F421S</sup>, Yta10<sup>F361A</sup> and Yta12<sup>F421A</sup>, Yta10<sup>F361E</sup> and Yta12<sup>F421E</sup>, Yta10<sup>G363A</sup> and Yta12<sup>G423A</sup>, Yta10<sup>M360K</sup> and Yta12<sup>M420K</sup>) were introduced using the PCR based Quick Change mutagenesis kit (Stratagene). Plasmids for expression of Yta10, his-tagged Yta10, Yta12 and their mutant variants carrying a mutation in the metalloprotease motif (Yta10<sup>E559Q</sup> or Yta12<sup>E614Q</sup>) under the control of *ADHI* promoter were described previously (Arlt et al., 1998).

### *Hydropathy analysis*

The hydropathy of Ccp1 segments was determined using the MPEx programme (<http://blanco.biomol.uci.edu/mpex/>) with following parameters;  $\Delta$ CONH value: 0; window length: 19; scale: WW octanol; aspartate and glutamate residues charged, histidine residues uncharged; partitioning: bilayer to water.

### *Determination of ATPase activities in vitro*

ATPase assays were performed essentially as described (Lill et al., 1990). Briefly, *m*-AAA protease complexes were dissolved in 50  $\mu$ l buffer F (50 mM Tris-HCl pH 8.0, 150 mM NaCl, 10% (v/v) glycerol, 300 mM imidazole, 0.2 % (v/v) NP-40, 2 mM ATP, 4 mM magnesium

acetate, 1 mM DTT, 25  $\mu$ M zinc acetate) at a final concentration of 3.5 nM (based on a AAA protease hexamer) and incubated at 30°C for various time points. Phosphate was quantified colorimetrically using malachite green.

### ***Yeast strains and growth conditions***

Yeast strains used in this study are listed in Table S1 (host strains) and S2 (transformants). Genes were deleted by polymerase chain reaction (PCR)-targeted homologous recombination (Wach et al., 1994). Cells were cultivated at 30°C in YP medium supplemented with 2 % (w/v) glucose or 2 % (w/v) galactose and 0.5 % (w/v) lactate, or synthetic complete (SC) medium supplemented with 2 % (w/v) galactose and 0.1 % (w/v) glucose if not indicated.

## Supplemental references

- Glick, B.S., Brandt, A., Cunningham, K., Muller, S., Hallberg, R.L. and Schatz, G. (1992) Cytochromes c1 and b2 are sorted to the intermembrane space of yeast mitochondria by a stop-transfer mechanism. *Cell*, **69**, 809-822.
- Lill, R., Dowhan, W. and Wickner, W. (1990) The ATPase activity of SecA is regulated by acidic phospholipids, SecY, and the leader and mature domains of precursor proteins. *Cell*, **60**, 271-280.
- Wach, A., Brachat, A., Poehlmann, R. and Philippsen, P. (1994) New heterologous modules for classical or PCR-based gene disruptions in *Saccharomyces cerevisiae*. *Yeast*, **10**, 1793-1808.
