# Supplementary material
Source: PubMed Central journal article supplement (PMC1783466)
Supplement: 7601514s3.pdf [file 7601514s3.pdf]

## Supplemental tables

**Table S1. Yeast host strains**

| Strain  | Genotype                                                                          | Source                            |
|---------|-----------------------------------------------------------------------------------|-----------------------------------|
| W303-1B | <i>MAT<math>\alpha</math> can1-100 ade2-1 his3-11,15 leu2-3,112 trp1-1 ura3-1</i> |                                   |
| YKO200  | W303-1B $\Delta$ yta10::HIS3MX6 $\Delta$ yta12::kanMX4                            | Koppen <i>et al.</i> , (in press) |
| YTT266  | W303-1B $\Delta$ ccp1::kanMX4                                                     | This study                        |
| YTT269  | W303-1B $\Delta$ yta10::HIS3MX6 $\Delta$ ccp1::kanMX4                             | This study                        |
| YTT271  | W303-1B $\Delta$ pcp1::HIS3MX6 $\Delta$ ccp1::kanMX4                              | This study                        |
| YTT273  | W303-1B $\Delta$ yta10::natMX4 $\Delta$ pcp1::HIS3MX6 $\Delta$ ccp1::kanMX4       | This study                        |
| YTT402  | W303-1B $\Delta$ yta10::HIS3MX6 $\Delta$ yta12::natMX4 $\Delta$ pcp1::kanMX4      | This study                        |

**Table S2. Yeast strains with plasmids**

| Strain | Host    | Plasmids                                                                                                   |
|--------|---------|------------------------------------------------------------------------------------------------------------|
| YTT248 | YKO200  | YCplac22 YCplac111                                                                                         |
| YTT259 | YKO200  | YCplac22-P <sub>ADHI</sub> -YTA10 <sup>his6</sup> YCplac111-P <sub>ADHI</sub> -YTA12                       |
| YTT260 | YKO200  | YCplac22-P <sub>ADHI</sub> -yta10 <sup>K334Ahis6</sup> YCplac111-P <sub>ADHI</sub> -yta12 <sup>K394A</sup> |
| YTT261 | YKO200  | YCplac22-P <sub>ADHI</sub> -yta10 <sup>E388Qhis6</sup> YCplac111-P <sub>ADHI</sub> -yta12 <sup>E448Q</sup> |
| YTT262 | YKO200  | YCplac22-P <sub>ADHI</sub> -yta10 <sup>E559Qhis6</sup> YCplac111-P <sub>ADHI</sub> -yta12 <sup>E614Q</sup> |
| YTT287 | W303-1B | pYX142                                                                                                     |
| YTT301 | YTT266  | pYX142                                                                                                     |
| YTT303 | YTT266  | pYX142-CCP1 <sup>his</sup>                                                                                 |
| YTT304 | YTT266  | pYX142-ccp1 <sup><math>\Delta</math>A2his</sup>                                                            |
| YTT305 | YTT266  | pYX142-ccp1 <sup><math>\Delta</math>A5his</sup>                                                            |
| YTT306 | YTT266  | pYX142-ccp1 <sup><math>\Delta</math>A9his</sup>                                                            |
| YTT308 | YTT266  | pYX142-ccp1 <sup>F23Shis</sup>                                                                             |
| YTT309 | YTT266  | pYX142-ccp1 <sup>F35Shis</sup>                                                                             |
| YTT310 | YTT266  | pYX142-ccp1 <sup>L20SL22Shis</sup>                                                                         |
| YTT311 | YTT266  | pYX142-ccp1 <sup>Y21Shis</sup>                                                                             |
| YTT312 | YTT266  | pYX142-ccp1 <sup>Y37Shis</sup>                                                                             |
| YTT313 | YTT266  | pYX142-ccp1 <sup>H242Phis</sup>                                                                            |
| YTT316 | YTT266  | pYX142-ccp1 <sup>H248EN251Dhis</sup>                                                                       |
| YTT317 | YTT266  | pYX142-ccp1 <sup>L22Shis</sup>                                                                             |
| YTT318 | YTT266  | pYX142-ccp1 <sup>F23SS24Fhis</sup>                                                                         |
| YTT352 | YTT269  | pYX142-CCP1 <sup>his</sup>                                                                                 |

|        |        |                                                                                                            |
|--------|--------|------------------------------------------------------------------------------------------------------------|
| YTT353 | YTT269 | pYX142- <i>ccp1</i> <sup>ΔA2his</sup>                                                                      |
| YTT354 | YTT269 | pYX142- <i>ccp1</i> <sup>ΔA5his</sup>                                                                      |
| YTT355 | YTT269 | pYX142- <i>ccp1</i> <sup>ΔA9his</sup>                                                                      |
| YTT357 | YTT269 | pYX142- <i>ccp1</i> <sup>F23Shis</sup>                                                                     |
| YTT358 | YTT269 | pYX142- <i>ccp1</i> <sup>F35Shis</sup>                                                                     |
| YTT359 | YTT269 | pYX142- <i>ccp1</i> <sup>L20SL22Shis</sup>                                                                 |
| YTT360 | YTT269 | pYX142- <i>ccp1</i> <sup>Y21Shis</sup>                                                                     |
| YTT361 | YTT269 | pYX142- <i>ccp1</i> <sup>Y37Shis</sup>                                                                     |
| YTT362 | YTT269 | pYX142- <i>ccp1</i> <sup>H242Phis</sup>                                                                    |
| YTT365 | YTT269 | pYX142- <i>ccp1</i> <sup>H248EN251Dhis</sup>                                                               |
| YTT366 | YTT269 | pYX142- <i>ccp1</i> <sup>L22Shis</sup>                                                                     |
| YTT367 | YTT269 | pYX142- <i>ccp1</i> <sup>F23SS24Fhis</sup>                                                                 |
| YTT375 | YTT271 | pYX142- <i>CCP1</i> <sup>his</sup>                                                                         |
| YTT376 | YTT271 | pYX142- <i>ccp1</i> <sup>ΔA2his</sup>                                                                      |
| YTT377 | YTT271 | pYX142- <i>ccp1</i> <sup>ΔA5his</sup>                                                                      |
| YTT378 | YTT271 | pYX142- <i>ccp1</i> <sup>ΔA9his</sup>                                                                      |
| YTT379 | YTT271 | pYX142- <i>ccp1</i> <sup>F23Shis</sup>                                                                     |
| YTT380 | YTT271 | pYX142- <i>ccp1</i> <sup>F35Shis</sup>                                                                     |
| YTT381 | YTT271 | pYX142- <i>ccp1</i> <sup>L20SL22Shis</sup>                                                                 |
| YTT382 | YTT271 | pYX142- <i>ccp1</i> <sup>Y21Shis</sup>                                                                     |
| YTT383 | YTT271 | pYX142- <i>ccp1</i> <sup>Y37Shis</sup>                                                                     |
| YTT384 | YTT271 | pYX142- <i>ccp1</i> <sup>H242Phis</sup>                                                                    |
| YTT386 | YTT271 | pYX142- <i>ccp1</i> <sup>H248EN251Dhis</sup>                                                               |
| YTT387 | YTT271 | pYX142- <i>ccp1</i> <sup>L22Shis</sup>                                                                     |
| YTT388 | YTT271 | pYX142- <i>ccp1</i> <sup>F23SS24Fhis</sup>                                                                 |
| YTT396 | YTT273 | pYX142- <i>CCP1</i> <sup>his</sup>                                                                         |
| YTT397 | YTT273 | pYX142- <i>ccp1</i> <sup>ΔA5his</sup>                                                                      |
| YTT398 | YTT273 | pYX142- <i>ccp1</i> <sup>F23Shis</sup>                                                                     |
| YTT458 | YKO200 | YCplac22-P <sub>ADHI</sub> -YTA10 <sup>his6</sup> YCplac111-P <sub>ADHI</sub> -yta12 <sup>E614Q</sup>      |
| YTT461 | YKO200 | YCplac22-P <sub>ADHI</sub> -yta10 <sup>E559Qhis6</sup> YCplac111-P <sub>ADHI</sub> -YTA12                  |
| YTT474 | YKO200 | YCplac22-P <sub>ADHI</sub> -YTA10 <sup>his6</sup> YCplac111-P <sub>ADHI</sub> -yta12 <sup>D689A</sup>      |
| YTT477 | YTT402 | YCplac22-P <sub>ADHI</sub> -yta10 <sup>E559Qhis6</sup> YCplac111-P <sub>ADHI</sub> -yta12 <sup>E614Q</sup> |
| YTT488 | YKO200 | YCplac22-P <sub>ADHI</sub> -yta10 <sup>D634Ahis6</sup> YCplac111-P <sub>ADHI</sub> -yta12                  |
| YTT489 | YKO200 | YCplac22-P <sub>ADHI</sub> -yta10 <sup>D634Ahis6</sup> YCplac111-P <sub>ADHI</sub> -yta12 <sup>D689A</sup> |
| YTT543 | YTT271 | pYX142- <i>CCP1</i>                                                                                        |
| YTT544 | YTT273 | pYX142- <i>CCP1</i>                                                                                        |
| YTT550 | YKO200 | YCplac22-P <sub>ADHI</sub> -yta10 <sup>F361Shis6</sup> YCplac111-P <sub>ADHI</sub> -yta12 <sup>F421S</sup> |
| YTT555 | YTT266 | pYX142- <i>CCP1</i>                                                                                        |

|        |        |                                                        |                                                                                                |
|--------|--------|--------------------------------------------------------|------------------------------------------------------------------------------------------------|
| YTT556 | YTT269 | pYX142-CCP1                                            |                                                                                                |
| YTT581 | YTT266 | pYX142-ccp1 <sup>S45TCS</sup>                          |                                                                                                |
| YTT582 | YTT269 | pYX142-ccp1 <sup>S45TCS</sup>                          |                                                                                                |
| YTT583 | YTT271 | pYX142-ccp1 <sup>S45TCS</sup>                          |                                                                                                |
| YTT584 | YTT273 | pYX142-ccp1 <sup>S45TCS</sup>                          |                                                                                                |
| YTT589 | YTT273 | pYX142-ccp1 <sup>S45TCS</sup>                          | pRS316 YCplac22-P <sub>ADHI</sub> -YTA10                                                       |
| YTT590 | YTT273 | pYX142-ccp1 <sup>S45TCS</sup>                          | pRS316 YCplac22-P <sub>ADHI</sub> -yta10 <sup>E388Q</sup>                                      |
| YTT591 | YTT273 | pYX142-ccp1 <sup>S45TCS</sup>                          | pRS316 YCplac22                                                                                |
| YTT595 | YTT273 | pYX142-ccp1 <sup>S45TCS</sup>                          | p416-P <sub>GALI</sub> -Cytb2(1-220)-TEV<br>YCplac22-P <sub>ADHI</sub> -YTA10                  |
| YTT596 | YTT273 | pYX142-ccp1 <sup>S45TCS</sup>                          | p416-P <sub>GALI</sub> -Cytb2(1-220)-TEV<br>YCplac22-P <sub>ADHI</sub> -yta10 <sup>E388Q</sup> |
| YTT597 | YTT273 | pYX142-ccp1 <sup>S45TCS</sup>                          | p416-P <sub>GALI</sub> -Cytb2(1-220)-TEV YCplac22                                              |
| YTT601 | YTT273 | pYX142-ccp1 <sup>S45TCS</sup>                          | p416-P <sub>GALI</sub> -Su9(1-69)-TEV<br>YCplac22-P <sub>ADHI</sub> -YTA10                     |
| YTT602 | YTT273 | pYX142-ccp1 <sup>S45TCS</sup>                          | p416-P <sub>GALI</sub> -Su9(1-69)-TEV<br>YCplac22-P <sub>ADHI</sub> -yta10 <sup>E388Q</sup>    |
| YTT603 | YTT273 | pYX142-ccp1 <sup>S45TCS</sup>                          | p416-P <sub>GALI</sub> -Su9(1-69)-TEV YCplac22                                                 |
| YTT611 | YKO200 | YCplac22-P <sub>ADHI</sub> -yta10 <sup>F361Ahis6</sup> | YCplac111-P <sub>ADHI</sub> -yta12 <sup>F421A</sup>                                            |
| YTT612 | YKO200 | YCplac22-P <sub>ADHI</sub> -yta10 <sup>F361Ehis6</sup> | YCplac111-P <sub>ADHI</sub> -yta12 <sup>F421E</sup>                                            |
| YTT613 | YKO200 | YCplac22-P <sub>ADHI</sub> -yta10 <sup>G363Ahis6</sup> | YCplac111-P <sub>ADHI</sub> -yta12 <sup>G423A</sup>                                            |
| YTT614 | YKO200 | YCplac22-P <sub>ADHI</sub> -yta10 <sup>M360Khis6</sup> | YCplac111-P <sub>ADHI</sub> -yta12 <sup>M420K</sup>                                            |
| YTT615 | YKO200 | YCplac22-P <sub>ADHI</sub> -yta10 <sup>V362Fhis6</sup> | YCplac111-P <sub>ADHI</sub> -yta12 <sup>V422F</sup>                                            |
| YTT649 | YTT271 | pYX142-Cytb2-TCS-GFP                                   | pRS316                                                                                         |
| YTT650 | YTT271 | pYX142-Cytb2-TCS-GFP                                   | p416-P <sub>GALI</sub> -Cytb2(1-220)-TEV                                                       |
| YTT651 | YTT271 | pYX142-Cytb2-TCS-GFP                                   | p416-P <sub>GALI</sub> -Su9(1-69)-TEV                                                          |
| YTT652 | YTT271 | pYX142-Su9(1-69)-TCS-GFP                               | pRS316                                                                                         |
| YTT653 | YTT271 | pYX142-Su9(1-69)-TCS-GFP                               | p416-P <sub>GALI</sub> -Cytb2(1-220)-TEV                                                       |
| YTT654 | YTT271 | pYX142-Su9(1-69)-TCS-GFP                               | p416-P <sub>GALI</sub> -Su9(1-69)-TEV                                                          |
| YTT691 | YTT271 | pYX142-CCP1                                            | pRS316                                                                                         |
| YTT692 | YTT271 | pYX142-CCP1                                            | p416-P <sub>GALI</sub> -Cytb2(1-220)-TEV                                                       |
| YTT693 | YTT271 | pYX142-CCP1                                            | p416-P <sub>GALI</sub> -Su9(1-69)-TEV                                                          |
| YTT694 | YTT273 | pYX142-CCP1                                            | pRS316                                                                                         |
| YTT695 | YTT273 | pYX142-CCP1                                            | p416-P <sub>GALI</sub> -Cytb2(1-220)-TEV                                                       |
| YTT696 | YTT273 | pYX142-CCP1                                            | p416-P <sub>GALI</sub> -Su9(1-69)-TEV                                                          |

---
